# Supplementary material
Source: ML conference proceedings conference paper supplement (https://proceedings.neurips.cc/paper_files/paper/2023/hash/b41907dd4df5c60f86216b73fe0c7465-Abstract.html)
Supplement: Supplementary file 1 [file b41907dd4df5c60f86216b73fe0c7465-Supplemental-Conference.pdf]

---

# Supplementary Materials

## PERFOGRAPH: A Numerical Aware Program Graph Representation for Performance Optimization and Program Analysis

---

Anonymous Author(s)  
Affiliation  
Address  
email

### 1 Insights of Digit Embedding

We investigated the effectiveness of Digit Embedding. Figure 1 shows the 2-d embeddings of integer numbers in the range [10, 60] and [100090-100140]. We take two ranges of numbers to better illustrate the results. We can see that the numbers in the (100090-100140) range are clustered together. The numbers with less difference, like (100133, 100134), (100127, 100128), and (100136, 100137), are close to each other. Also, the numbers with greater differences, like (100126, 100135) and (100196, 100133), are far from each other in the embedding space. A similar analysis is also true for the (10, 60) range. We can see that the numbers 21, 22, 28, and 29 are close to each other as they have small differences but numbers 11 and 59 are far from each other as they have greater differences.

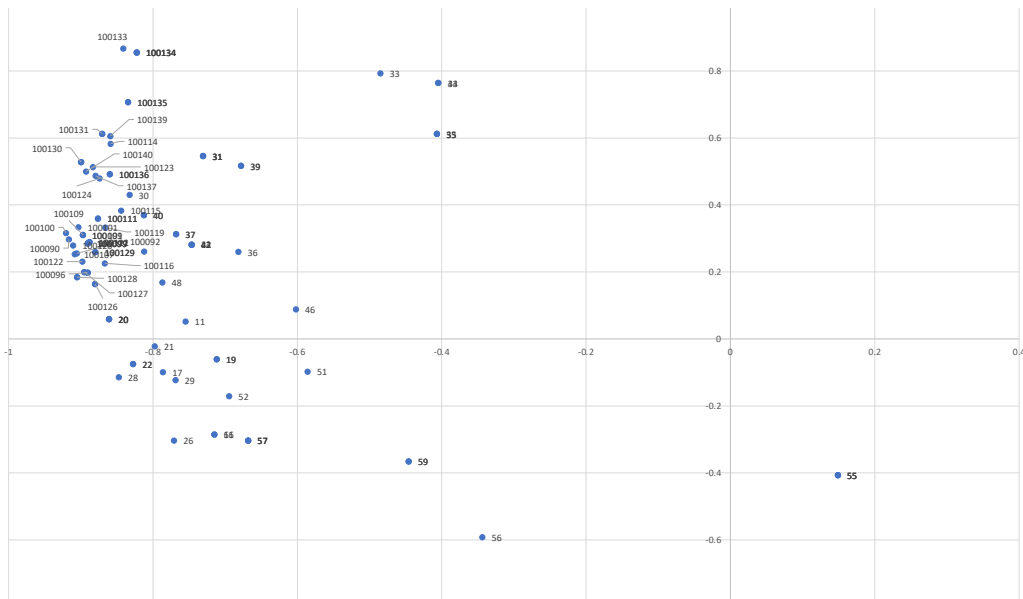

Figure 1: Embedding of integer numbers in the range [10-60] and [100090-100140]

10 We investigated with more ranges. Figure 2 shows the 2-d embedding of integer numbers in the range  
 11 [1, 50] and [50000-500090]. Here we can also see that numbers with smaller differences like (50034,  
 12 50035, 50038, 50039), (13, 17), and (19, 21) are also closer to each other in the embedding space.  
 13 Whereas numbers like (50011, 50028), (50017, 50029), and (2, 17) are far from each other in the  
 14 embedding space as their differences are also greater.

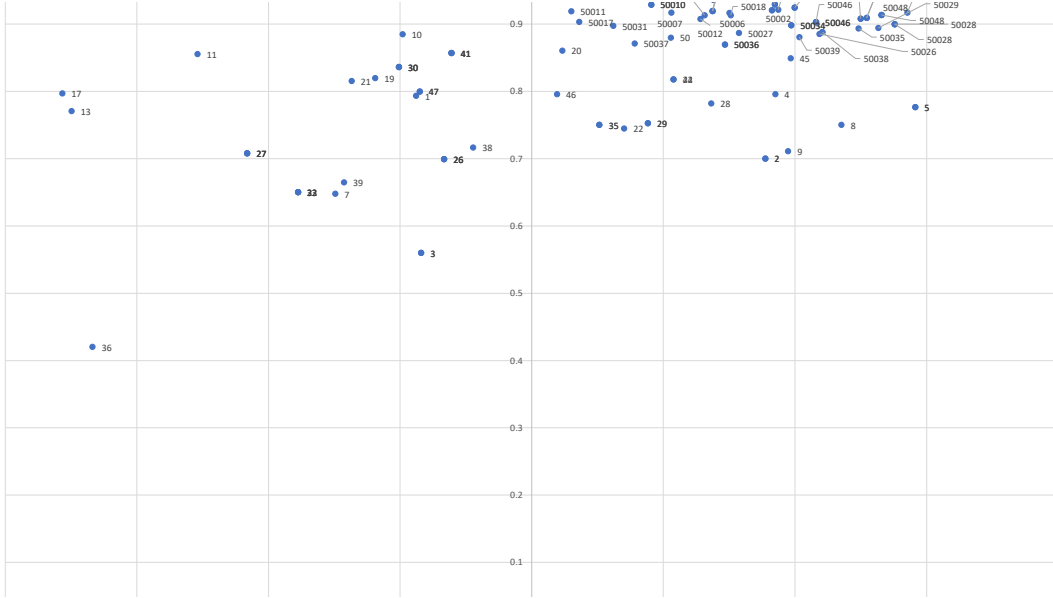

Figure 2: Embedding of integer numbers in the range [1-50] and [50000-500090]

15 Figure 3 shows the 2-d embedding of decimal numbers in the range [1.0, 10.0] and [20.0-31.0]. We  
 16 can see that our embedding works similarly as the numbers with smaller differences like (2.236,  
 17 4.529), (1.647, 5.339), (23.0129, 23.3484, 24.5235, 25.8604) are close to each other in the embedding  
 18 space. And the numbers with larger differences like (1.6478, 30.7010), (5.339, 30.5113) are far from  
 19 each other in the embedding space.

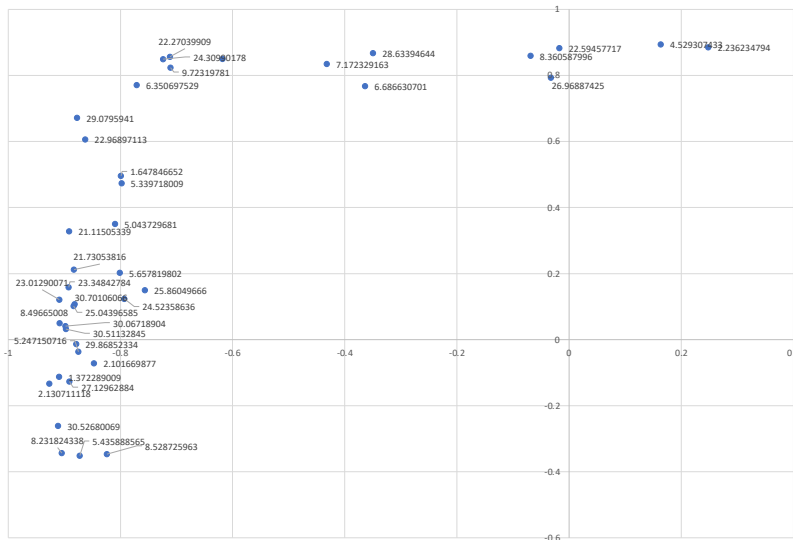

Figure 3: Embedding of decimal numbers in the range [1.0, 10.0] and [20.0-31.0]

20 So, the above examples clearly demonstrate the effectiveness of Digit Embedding for generating the  
 21 embedding of both integer and decimal numbers.

## 22 2 Model’s architecture

23 Table 1 shows the architecture and the hyper-  
 24 parameters of our PERFOGRAPH model. For  
 25 each one of the downstream tasks, we have two  
 26 or more classes. While training the PERFO-  
 27 GRAPH model, the class with the higher proba-  
 28 bility score is chosen as the predicted class and  
 29 is compared against the actual class.

30 Figure 4 shows the error rate (loss value) of  
 31 PERFOGRAPH model per epoch for the device  
 32 mapping task. As shown, the model can learn  
 33 from our PERFOGRAPH graph as it is able to  
 34 decrease the error rate per epoch.

35 The source code of PERFOGRAPH for  
 36 this task is available at the following link:  
 37 [https://anonymous.4open.science/r/  
 38 perfograph\\_devmap-532F/](https://anonymous.4open.science/r/perfograph_devmap-532F/)

Table 1: PERFOGRAPH model architecture

| Parameter            | Detail         |
|----------------------|----------------|
| Convolution Type     | RGCN           |
| # Conv Layers        | 2              |
| Aggregation Function | Sum            |
| Activation Function  | Relu           |
| Max Token Length     | 40             |
| Embedding Dim        | 120            |
| Padding              | True           |
| Hidden Dim           | 64             |
| Output Layer Size    | num_class      |
| Optimizer            | Adam           |
| Learning rate        | 0.01 (default) |

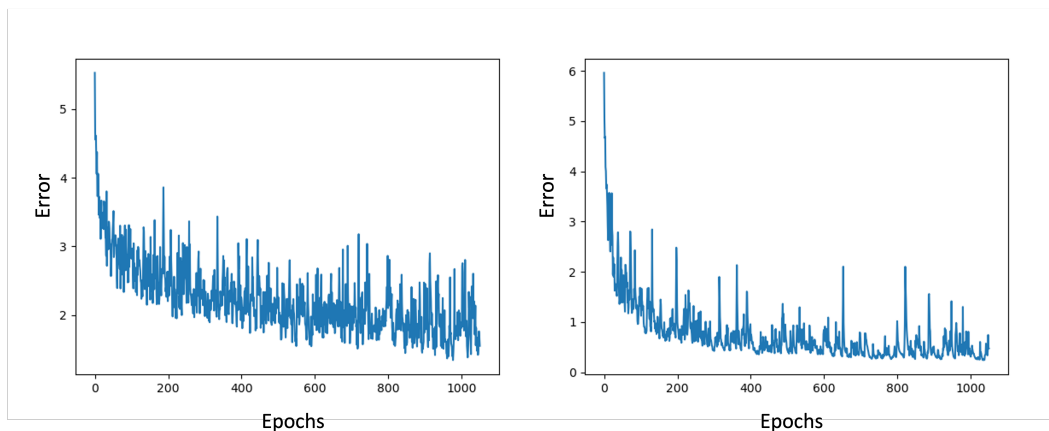

Figure 4: Error rate per epoch for AMD (left) and NVIDIA (right) datasets

## 39 3 Ablation Study

40 We further analyzed how each one of the enhancements in PERFOGRAPH affects the results. To this  
 41 end, we performed an ablation study on the Device Mapping task, and training our GNN models on  
 42 variations of PERFOGRAPH.

### 43 3.1 Results without Composite data type nodes

44 First, we remove the representation of composite data types in our PERFOGRAPH representation.  
 45 Please note that in this setup, the Digit Embedding is still applied. Table 2 and 3 shows the results. We  
 46 can see that when the representation does not support composite data types, the error rate increases to  
 47 13% in AMD and 15% in NVIDIA dataset. This clearly indicates that having composite-type nodes  
 48 in the representation helped the model to learn the code features more accurately.

## 49 3.2 Results without Digit Embedding

50 We remove Digit Embedding from our pipeline for the second experiment and keep the composite  
51 nodes. Table 2 and 3 shows the results. We can see that unlike having composite-type nodes, removing  
52 digit embedding does not hurt the error rate that much for the task of device mapping. However, we  
53 can still see a small increase (1.1%) in the error rate for AMD dataset. For the NVIDIA dataset, the  
54 error rate increases from 10.0 to 10.6%.

Table 2: Summarizing PERFOGRAPH results for AMD device.

| Approach                                                 | Error (%) |
|----------------------------------------------------------|-----------|
| DeepTune Cummins et al. [2017]                           | 28.1      |
| inst2vec Ben-Nun et al. [2018]                           | 19.7      |
| PROGRAML Cummins et al. [2020]                           | 13.4      |
| PERFOGRAPH (without composite data type nodes)           | 13.0      |
| PERFOGRAPH (without digit embedding)                     | 7.1       |
| PERFOGRAPH (composite data type nodes + digit embedding) | 6.0       |

Table 3: Summarizing PERFOGRAPH results for NVIDIA device.

| Approach                                                 | Error (%) |
|----------------------------------------------------------|-----------|
| DeepTune Cummins et al. [2017]                           | 39.0      |
| inst2vec Ben-Nun et al. [2018]                           | 21.5      |
| PROGRAML Cummins et al. [2020]                           | 20.0      |
| PERFOGRAPH (without composite data type nodes)           | 15.0      |
| PERFOGRAPH (without digit embedding)                     | 10.6      |
| PERFOGRAPH (composite data type nodes + digit embedding) | 10.0      |

55 Finally, we can conclude that both components in our representation helped the model learn the code  
56 features better to some extent. However, composite data type nodes in the embedding helped our  
57 model more than Digit Embedding for the task of device mapping. The reason can be that there are  
58 not many numbers in the dataset. However, in tasks where there are many numbers, Digit Embedding  
59 can play an important role.

## 60 4 Details of Datasets:

### 61 4.1 Device Mapping

62 For this task, we used the Device Mapping Dataset. It contains around 256 OpenCL kernels. Around  
63 671 IR files are extracted from these kernels. There are two types of devices: AMD and NVIDIA. For  
64 each of the devices, we have two classes: CPU and GPU indicating whether the kernel performs well  
65 in CPU or GPU. For AMD, we have 276 kernels for GPU and 395 kernels for CPU. For NVIDIA, we  
66 have 385 kernels for GPU and 286 kernels for CPU. We use 80% of the IR files for training, 10% for  
67 validation, and 10% for testing. For the AMD experiment, we used 36 IR files from CPU and 31 IR  
68 files from GPU for testing. For the NVIDIA experiment, we used 30 IR files from CPU and 37 IR  
69 files from GPU for testing.

### 70 4.2 Parallelism Discovery

71 For Parallelism Discovery, the OMP\_Serial Dataset is used. The dataset contains 5731 compilable  
72 source c files. We compile these source files using Clang to create IR files. Also, 58 transformation  
73 flags from LLVM are applied to increase the dataset. The list of flags is provided in table 4 There  
74 are around 30k files in the training set. There are two classes: Parallel and Non-Parallel. The loops  
75 with the OpenMP pragma "#pragma omp parallel for" are considered as Parallel loops and the loops  
76 without this pragma are considered as Non-Parallel loops. To ensure the correctness of data labels,  
77 three existing parallelism suggestion tools: Pluto, autoPar, and DiscoPoP, are used to create three

Table 4: List of the transformation flags

|                                     |                                       |
|-------------------------------------|---------------------------------------|
| -adce                               | -dse                                  |
| -always-inline                      | -aggressive-instcombine               |
| -argpromotion                       | -lcssa                                |
| -bb-vectorize                       | -licm                                 |
| -block-placement                    | -loop-deletion                        |
| -break-crit-edges                   | -loop-extract                         |
| -dce                                | -loop-extract-single                  |
| -deadargelim                        | -loop-reduce                          |
| -deadtypeelim                       | -loop-rotate                          |
| -die                                | -loop-simplify                        |
| -loop-unroll                        | -block-placement -break-crit-edges    |
| -loop-unroll-and-jam                | -break-crit-edges -argpromotion       |
| -loop-unswitch                      | -break-crit-edges -dce                |
| -lower-global-dtors                 | -dce -deadargelim                     |
| -loweratomic                        | -deadargelim -deadtypeelim            |
| -lowerinvoke                        | -deadtypeelim -die                    |
| -lowerswitch                        | -die -dse                             |
| -adce -always-inline                | -aggressive-instcombine -lcssa        |
| -argpromotion -always-inline        | -lcssa -licm                          |
| -bb-vectorize -argpromotion         | -licm -loop-deletion                  |
| -loop-deletion -loop-extract        |                                       |
| -loop-extract -loop-extract-single  | -loweratomic -lowerinvoke             |
| -loop-extract-single -loop-reduce   | -lowerinvoke -lowerswitch             |
| -loop-reduce -loop-rotate           | -lowerswitch -dse                     |
| -loop-rotate -loop-simplify         | -die -dse                             |
| -loop-simplify -loop-unroll         | -break-crit-edges -dce                |
| -loop-unroll -loop-unroll-and-jam   | -break-crit-edges -lower-global-dtors |
| -loop-unroll-and-jam -loop-unswitch | -dce -lowerinvoke                     |
| -loop-unswitch -lower-global-dtors  | -deadargelim -loweratomic             |
| -lower-global-dtors -loweratomic    |                                       |

78 testing subsets. So, all of the testing data are checked by at least one of the tools. The performance of  
79 PerfoGraph is reported for each of the testing subsets.

### 80 4.3 Parallel Pattern Detection

81 The OMP\_Serial Dataset also contains source codes of three different patterns: Do-all (Private) (200  
82 files), Reduction (200 files), and Stencil (300 files). The do-all and Reduction patterns are detected  
83 using DiscoPoP. For both Do-all and Reduction patterns 20 templates are extracted and then 10  
84 different variations are applied to those templates. We consider simple variations like renaming  
85 variables/functions and changing operators to preserve the pattern of the original source code. There  
86 are currently no tools available for detecting Stencil patterns. So, they are labeled manually. There  
87 are three types of Stencils: 1-d, 2-d, and 3-d. For each type, we extracted 10 templates and applied  
88 10 variations on each of those templates to generate the 300 Stencil loops. For generating the source  
89 codes from templates Jinja and SymPy are used. Some examples of templates and generated codes  
90 are shown in Listing 1, 2, 3, and 4. For more details regarding the dataset, it is encouraged to look  
91 into the paper by Chen *et al.* Chen et al. [2023].

```

for ({{cnt}} = 0; {{cnt}} <
{{limit}}; {{cnt}} = {{cnt}} +
{{constant}})
{
    //do-all operation
    {{operand}} = {{operand}}
    {{operator}} {{operand}};
}

```

Listing 1: A sample do-all template

```

for ({{cnt}} = 0; {{cnt}} <
{{limit}}; {{cnt}} = {{cnt}} +
{{constant}})
{
    /*reduction operation*/
    {{reduction_var}} = {{reduction_var}}
    {{reduction_operator}} ({{term}});
}

```

Listing 2: A sample reduction template

```

dst[0,0] @= src[0, 0] + src[1, 0] +
            src[-1, 0] + src[0, 1] +
            src[0, -1]

```

Listing 3: A sample Stencil template for Sympy input

```

for (int ctr_0 = 1; ctr_0 < 99;
      ctr_0 += 1) {
    double * RESTRICT _data_dst_00 =
    _data_dst + 100*ctr_0;
    double * RESTRICT _data_src_00 =
    _data_src + 100*ctr_0;
    double * RESTRICT _data_src_01 =
    _data_src + 100*ctr_0 + 100;
    double * RESTRICT _data_src_0m1 =
    _data_src + 100*ctr_0 - 100;
    for (int64_t ctr_1 = 1; ctr_1 < 99;
          ctr_1 += 1) {
        _data_dst_00[ctr_1] =
        _data_src_00[ctr_1 + 1]
        + _data_src_00[ctr_1 - 1]
        + _data_src_00[ctr_1]
        + _data_src_01[ctr_1]
        + _data_src_0m1[ctr_1];
    }
}

```

Listing 4: Generated stencil loop using Sympy

#### 96 4.4 Numa and Prefetchers Configuration Prediction

97 The dataset we used for the Numa and Prefetchers Configuration Prediction is from a prior study by  
98 TehraniJamsaz *et al.* TehraniJamsaz et al. [2022]. It contains 57000 IR files generated by various  
99 LLVM compiler optimization flags. Each IR file within the dataset is accompanied by its runtime  
100 on two architectures, Sandy Bridge and Skylake, across thirteen different NUMA and prefetcher  
101 configurations.

102 **References**

- 103 T. Ben-Nun, A. S. Jakobovits, and T. Hoefler. Neural code comprehension: A learnable representation  
104 of code semantics. *Advances in Neural Information Processing Systems*, 31, 2018.
- 105 L. Chen, Q. I. Mahmud, H. Phan, N. K. Ahmed, and A. Jannesari. Learning to parallelize with  
106 openmp by augmented heterogeneous ast representation. *arXiv preprint arXiv:2305.05779*, 2023.
- 107 C. Cummins, P. Petoumenos, Z. Wang, and H. Leather. End-to-end deep learning of optimization  
108 heuristics. In *2017 26th International Conference on Parallel Architectures and Compilation  
109 Techniques (PACT)*, pages 219–232. IEEE, 2017.
- 110 C. Cummins, Z. V. Fisches, T. Ben-Nun, T. Hoefler, and H. Leather. Programl: Graph-based deep  
111 learning for program optimization and analysis. *arXiv preprint arXiv:2003.10536*, 2020.
- 112 A. TehraniJamsaz, M. Popov, A. Dutta, E. Saillard, and A. Jannesari. Learning intermediate rep-  
113 resentations using graph neural networks for numa and prefetchers optimization. In *2022 IEEE  
114 International Parallel and Distributed Processing Symposium (IPDPS)*, pages 1206–1216. IEEE,  
115 2022.
